# Supplementary material for: Synergistic optimization of the thermoelectric performance of BiSbSe3 using doping and multi-scale defect engineering
Source: Royal Society of Chemistry journal article supplement (doi:10.1039/d4ta03432e), 2024-01-01
Supplement: d4ta03432e1.pdf [file d4ta03432e1.pdf]

## **Supplemental Information:**

### **Synergistic optimization of the thermoelectric performance of BiSbSe<sub>3</sub> using doping and multi-scale defect engineering**

Xiaowei Shi<sup>a</sup>, Zhen Tian<sup>a</sup>, Quanwei Jiang<sup>a</sup>, Yu Yan<sup>a</sup>, Huijun Kang<sup>a,b,\*</sup>, Enyu Guo<sup>a,b</sup>,  
Zongning Chen<sup>a,b</sup>, Tongmin Wang<sup>a,b,\*</sup>

<sup>a</sup> Key Laboratory of Solidification Control and Digital Preparation Technology (Liaoning Province), School of Materials Science and Engineering, Dalian University of Technology, Dalian, 116024, China

<sup>b</sup> Ningbo Institute of Dalian University of Technology, Ningbo, 315000, China

\*Corresponding authors.

E-mail addresses: kanghuijun@dlut.edu.cn (Huijun Kang); tmwang@dlut.edu.cn (Tongmin Wang)

## 1. Calculation of Pisarenko curves.

The Boltzmann transport equation of the single parabolic band (SPB) model is used to calculate the Pisarenko curves, describing the relationship between  $S$  and  $n$ . The SPB model can be expressed by the following formula<sup>123</sup>:

$$S = \pm \frac{\kappa_B (\lambda + 5/2) F_{\lambda+3/2}(\eta)}{e (\lambda + 3/2) F_{\lambda+1/2}(\eta)} - \eta \quad (1)$$

$$n = 4\pi \left( \frac{2m^* \kappa_B T}{h^2} \right)^{3/2} F_{1/2}(\eta) \quad (2)$$

$$F_n(\eta) = \int_0^\infty \frac{x^n}{1 + e^{x-\eta}} dx \quad (3)$$

where  $\kappa_B$  is the Boltzmann constant,  $e$  is the electron charge,  $\eta$  is the reduced Fermi energy,  $F_n(\eta)$  is the  $n$ th order Fermi integral, and  $h$  is the Planck constant. Acoustic phonon scattering is the dominant electron scattering mechanism with the scattering factor  $\lambda = -1/2$ . According to Equations (1)-(3), Pisarenko curves were plotted.

## 2. Calculation of Lorenz numbers.

The electronic thermal conductivity  $\kappa_e$  can be calculated by the Wiedemann-Franz law ( $\kappa_e = L\sigma T$ ), where  $L$  is the Lorenz constant. Usually the degeneracy limit and non-degeneracy limit values of  $L$  are  $L_0 \approx 2.45 \times 10^{-8} \text{ W}\Omega\text{K}^{-2}$  and  $L_1 \approx 1.5 \times 10^{-8} \text{ W}\Omega\text{K}^{-2}$  respectively, while the values of  $L$  for thermoelectric materials are often in between.  $L$  can be calculated using the following formula<sup>4</sup>:

$$L = \left( \frac{\kappa_B}{e} \right)^2 \left[ \frac{(\lambda + 7/2) F_{\lambda+5/2}(\eta)}{(\lambda + 3/2) F_{\lambda+1/2}(\eta)} - \frac{(\lambda + 5/2) F_{\lambda+3/2}(\eta)}{(\lambda + 3/2) F_{\lambda+1/2}(\eta)} \right]^2 \quad (4)$$

where the value of  $\lambda$  equates  $-1/2$  for the acoustic phonon scattering, and the calculation formula of  $L$  is simplified as:

$$L = \left(\frac{\kappa_B}{e}\right)^2 \frac{3F_0F_2 - 4F_1^2}{F_0^2} \quad (5)$$

### 3. Calculation of total heat capacity.

The total heat capacity of the samples is calculated using the heat capacity of the phonon harmonic term under the Debye model<sup>5,6</sup>, which is basically consistent with the literature reports, the formula as follows:

$$C_p(T) = 9n_m\kappa_B \left(\frac{T}{\theta_D}\right)^3 \int_0^{\theta_D/T} \frac{x^4 e^x}{(e^x - 1)^2} dx \quad (6)$$

$$\theta_D = \frac{h}{\kappa_B} \left(\frac{3N}{4\pi V}\right)^{1/3} v_s \quad (7)$$

$$V_s = \left\{ \frac{1}{3} \left( \frac{1}{v_l^3} + \frac{2}{v_t^3} \right) \right\}^{(-1/3)} \quad (8)$$

where  $C_p$ ,  $n_m$ ,  $\theta_D$ ,  $N$ ,  $V$ ,  $v_s$  are the heat capacity of harmonic phonon term, number of atoms per unit mass, Debye temperature, number of atoms per unit cell, volume per unit cell, average phonon velocity, respectively.

## 4. Supplemental figures.

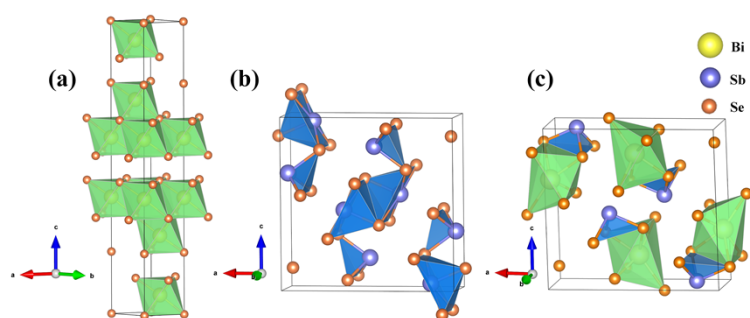

**Fig.S1.** Crystal structures of (a)  $\text{Bi}_2\text{Se}_3$ , (b)  $\text{Sb}_2\text{Se}_3$ , (c)  $\text{BiSbSe}_3$ .

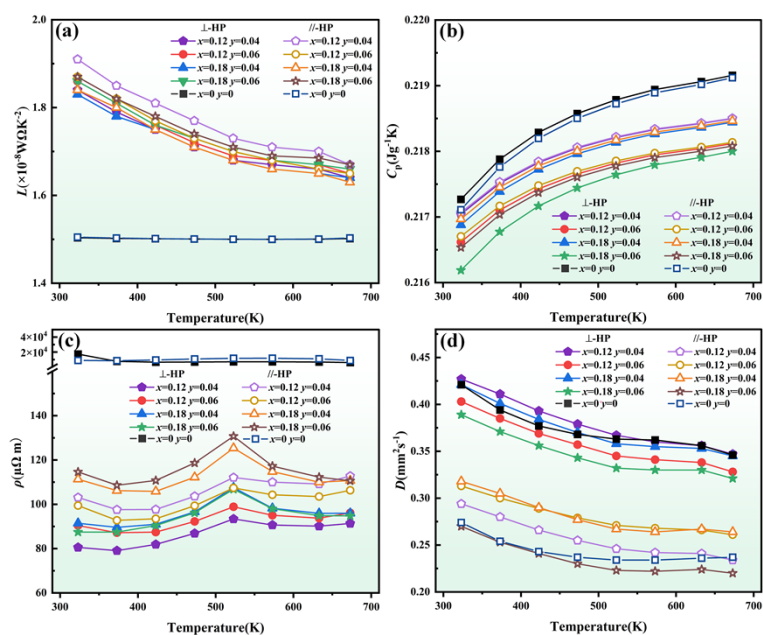

**Fig.S2.** Thermal transport properties as a function of temperature for  $\text{BiSbSe}_{3-x-y}\text{Br}_x\text{I}_y$  ( $x=0, 0.12, 0.18; y=0, 0.04, 0.06$ ): (a) Lorenz constant, (b) heat capacity, (c) electrical resistivity, (d) thermal diffusivity.

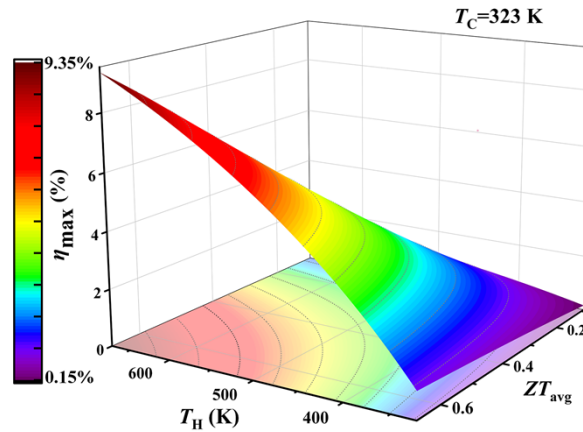

**Fig.S3.** The  $\text{BiSbSe}_{2.78}\text{Br}_{0.18}\text{I}_{0.04}$  thermoelectric conversion efficiency  $\eta$  as a function of the hot-side temperature and average figure of merit  $ZT_{\text{avg}}$  at the cold side temperature  $T_C=323$  K.

## References

- 1 X. Qian, D. Wang, Y. Zhang, H. Wu, S. J. Pennycook, L. Zheng, P. F. P. Poudeu and L. D. Zhao, *J. Mater. Chem. A*, 2020, **8**, 5699–5708.
- 2 H. Wu, C. Chang, D. Feng, Y. Xiao, X. Zhang, Y. Pei, L. Zheng, D. Wu, S. Gong, Y. Chen, J. He, M. G. Kanatzidis and L. D. Zhao, *Energy Environ. Sci.*, 2015, **8**, 3298–3312.
- 3 D. Zhang, J. Lei, W. Guan, Z. Ma, Z. Cheng, L. Zhang, C. Wang and Y. Wang, *Mater. Sci. Semicond. Process.*, 2019, **93**, 299–303.
- 4 W. Liu, J. Zhou, Q. Jie, Y. Li, H. S. Kim, J. Bao, G. Chen and Z. Ren, *Energy Environ. Sci.*, 2016, **9**, 530–539.
- 5 M. Bouafia and H. Sadat, *Int. J. Thermophys.*, 2020, **41**, 1–6.
- 6 K. Kurosaki, A. Kosuga, H. Muta, M. Uno and S. Yamanaka, *Appl. Phys. Lett.*, 2005, **87**, 85–88.
